# Supplementary material for: Design, synthesis and DNA interactions of a chimera between a platinum complex and an IHF mimicking peptide
Source: Royal Society of Chemistry journal article supplement (doi:10.1039/c5ob01885d), 2015-01-01
Supplement: c5ob01885d1.pdf [file c5ob01885d1.pdf]

## Design, synthesis and DNA interaction of chimera between a platinum complex and an IHF mimicking peptide

Harita Rao, Mariana S. Damian, Alak Alshiekh, Sofi K. C. Elmroth, Ulf Diederichsen

### Supporting Information

#### Synthesis of the platinated dendrimeric units of IHF

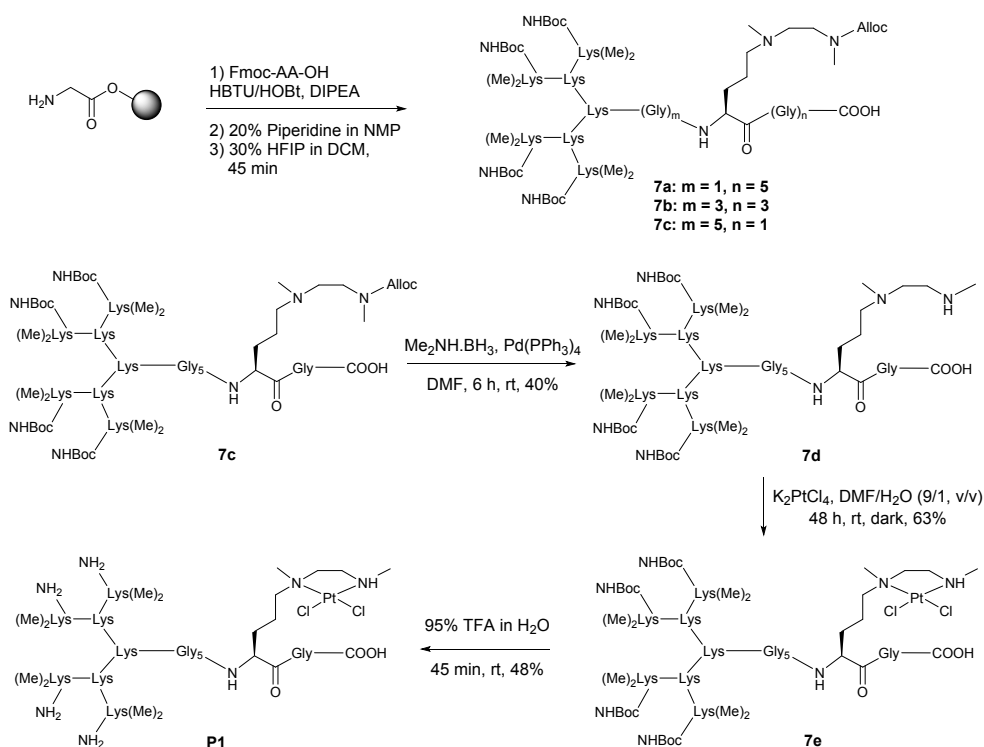

**Scheme S1:** Synthesis of the dendrimeric peptides **7a-c** and **P1** connected to the glycine linker containing the platinum chelating unit.

**Synthesis of peptide 7d:** Peptide **7c** (45 mg, 22  $\mu\text{mol}$ , 1 eq) was dissolved in dry DMF (4.5 mL) under argon atmosphere. To this solution  $\text{Me}_2\text{NH.BH}_3$  (52 mg, 0.88 mmol, 40 eq) and  $\text{Pd}(\text{PPh}_3)_4$  (2.55 mg, 2.2  $\mu\text{mol}$ , 0.1 eq) were added. After stirring the reaction mixture for 6 h at room temperature the solvent was removed under vacuum and the residue was purified by RP-HPLC. Yield (17 mg, 8.7  $\mu\text{mol}$ , 40%). HPLC (10-60% B in 30 min)  $t_R = 21.81$  min. MS (ESI):  $m/z = 978.7$   $[\text{M}+2\text{H}]^{+2}$ , 652.8  $[\text{M}+3\text{H}]^{+3}$ , 489.8  $[\text{M}+4\text{H}]^{+4}$ , 392.1  $[\text{M}+5\text{H}]^{+5}$ . HRMS (ESI) = calculated for  $[\text{C}_{95}\text{H}_{176}\text{N}_{23}\text{O}_{23}]^{+5}$   $[\text{M}+5\text{H}]^{+5} = 392.0663$ , found = 392.0660.

**Synthesis of peptide 7e:** Peptide **7d** (17 mg, 8.7  $\mu\text{mol}$ , 1 eq) and  $\text{K}_2\text{PtCl}_4$  (108.34 mg, 0.261 mmol, 30 eq) were dissolved in  $\text{DMF}/\text{H}_2\text{O}$  (4 mL, 9/1, v/v). After stirring the reaction mixture for 48 h at room temperature in dark the solvent was

removed under vacuum and the residue was purified by RP-HPLC. Yield (12.18 mg, 5.48  $\mu\text{mol}$ , 63%). HPLC (5-60% B in 30 min)  $t_R = 25.33$  min. MS (ESI):  $m/z = 1111.6$   $[\text{M}+2\text{H}]^{+2}$ , 741.1  $[\text{M}+3\text{H}]^{+3}$ , 556.1  $[\text{M}+4\text{H}]^{+4}$ , 446.1  $[\text{M}+5\text{H}]^{+5}$ . HRMS (ESI): calculated for  $[\text{C}_{91}\text{H}_{173}\text{Cl}_2\text{N}_{23}\text{O}_{23}\text{Pt}]^{+2}$  ( $[\text{M}+2\text{H}]^{+2}$ ) = 1111.6052, found = 1111.6068.

**Synthesis of peptide P1:** After stirring a solution of peptide **7e** in aqueous 95% TFA (1.5 mL) at room temperature for 45 min in dark the solvent was evaporated by argon bubbling. Thereafter, the residue was purified by RP-HPLC. Yield: (4.78 mg, 2.63  $\mu\text{mol}$ , 48%). HPLC (5-30% B in 30 min)  $t_R = 17.91, 19.38, 20.74$  min. MS (ESI):  $m/z = 911.0$   $[\text{M}+2\text{H}]^{+2}$ , 607.7  $[\text{M}+3\text{H}]^{+3}$ , 456.0  $[\text{M}+4\text{H}]^{+4}$ , 366.0  $[\text{M}+5\text{H}]^{+5}$ . HRMS (ESI): calculated for  $[\text{C}_{71}\text{H}_{142}\text{Cl}_2\text{N}_{23}\text{O}_{15}\text{Pt}]^{+3}$  ( $[\text{M}+3\text{H}]^{+3}$ ) = 607.6689, found = 607.6694.

### Synthesis of the cyclic recognition unit of IHF

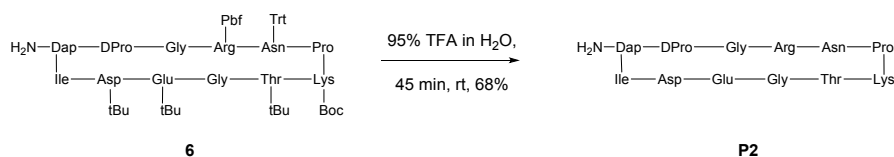

**Scheme S2.** Synthesis of the cyclic peptide **P2** mimicking the minor groove intercalating loop of IHF.

**Synthesis of P2:** Peptide **6** (5 mg, 2.48  $\mu\text{mol}$ , 1 eq) was dissolved in 95% TFA (1.5 mL). After stirring the reaction mixture for 45 min at room temperature the solvent was evaporated by drying with argon. The crude product was precipitated in cold diethylether and the residue obtained after cold centrifugation and lyophilization from water was purified by RP-HPLC. Yield: (2.12 mg, 1.69  $\mu\text{mol}$ , 68%). HPLC (60-100% B in 30 min)  $t_R = 13.2$  min. MS (ESI):  $m/z = 1251.7$   $[\text{M}+\text{H}]^+$ , 626.3  $[\text{M}+2\text{H}]^{+2}$ . HRMS (ESI) = calculated for  $[\text{C}_{52}\text{H}_{88}\text{N}_{18}\text{O}_{18}]^{+2}$  ( $[\text{M}+2\text{H}]^{+2}$ ) = 626.3257, found = 626.3260.

### Polyacrylamide gel electrophoresis after incubation of IHF-4 with various DNA duplexes containing a GG site

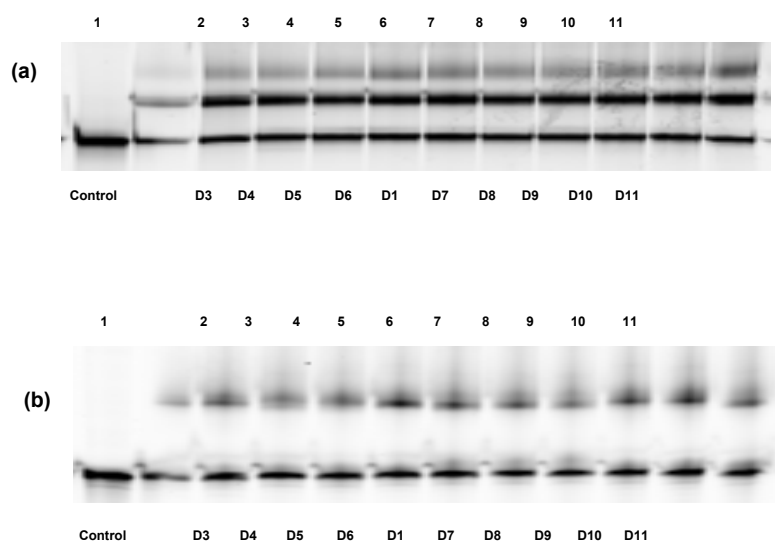

**Figure S1.** Gel electrophoresis assay to study the interaction of the IHF mimicking peptides with the 34-mer DNA duplex consisting of a GG site. The duplexes **D1** and **D3-D10** consist of the IHF consensus sequence, whereas the duplex **D11** is a random sequence. The samples were incubated for 17 h at 37 °C in 10 mM  $\text{Na}_2\text{HPO}_4/\text{NaH}_2\text{PO}_4$ , 100 mM  $\text{NaClO}_4$ , pH 5.8. Lane 1-11 contains 0.5  $\mu\text{M}$  DNA duplex with 10  $\mu\text{M}$  of **IHF-4**. (a) Performed under native conditions (20% PAA, 1xTBE). (b) Performed under denaturing conditions (20% PAA, 7 M urea, 1x TBE).

**DNA sequences used in this study:**

5' TAAAAAAGCATTGCCTTATCAATTTGTTGCAACGA3' (D1)  
3' ATTTTTTCGTAACGATAGTTAAACAACGTTGCT5'

5' TAAAAAAGCATTGCTTATCAACCTGTTGCAACGA3' (D7)  
3' ATTTTTTCGTAAACGAATAGTTCGACAACGTTGCT5'

5' TAAAAACGATTGCTTATCAATTTGTTGCAACGA3' (D3)  
3' ATTTTTTCCTAACGAATAGTTAAACAACGTTGCT5'

5' TAAAAAAGCATTGCTTATCAATCCGTTGCAACGA3' (D8)  
3' ATTTTTTCGTAAACGAATAGTTCGCAACGTTGCT5'

5' TAAAAAACCATTGCTTATCAATTTGTTGCAACGA3' (D4)  
3' ATTTTTTCGTAAACGAATAGTTAAACAACGTTGCT5'

5' TAAAAAAGCATTGCTTATCAATTCCTTGCAACGA3' (D9)  
3' ATTTTTTCGTAAACGAATAGTTAACGAACGTTGCT5'

5' TAAAAAAGCCTTGCTTATCAATTTGTTGCAACGA3' (D5)  
3' ATTTTTTCGAACGAATAGTTAAACAACGTTGCT5'

5' TAAAAAAGCATTGCTTATCAATTTCTTGCAACGA3' (D10)  
3' ATTTTTTCGTAAACGAATAGTTAACGACGTTGCT5'

5' TAAAAAAGCATTTCCTTATCAATTTGTTGCAACGA3' (D6)  
3' ATTTTTTCGTAACGAATAGTTAAACAACGTTGCT5'

5' ACTAGTTACTGCATACGATCTAGCATTGATCA3' (D11)  
3' TGATCAATGACGTATCCTAGATCGTAAGTCTAGT5'
